# Supplementary material for: Studies on the Coordination of Ribosomal Protein Assembly Events Involved in Processing and Stabilization of Yeast Early Large Ribosomal Subunit Precursors
Source: PLOS journal article supplement (doi:10.1371/journal.pone.0143768), 2015-12-07
Supplement: S6 (10.1371/journal.pone.0143768.s006) [file journal.pone.0143768.s006]

|           |                                           |      |                                                                                                                                                                                                                                                                                                   |
|-----------|-------------------------------------------|------|---------------------------------------------------------------------------------------------------------------------------------------------------------------------------------------------------------------------------------------------------------------------------------------------------|
| pAGH1     | Ycplac33-RPL16B                           | URA3 | product of a PCR with genomic DNA as template and primers AG9/O1235 was SpeI/PstI digested and cloned into Ycplac33                                                                                                                                                                               |
| pAGH2     | Ycplac33-RPL16BΔInt                       | URA3 | product of a PCR with pAGH1 as template and primers AG9/AG10 was SpeI/Bpu10i digested and cloned into SpeI/Bpu10i digested pAGH1                                                                                                                                                                  |
| pAGH3     | Ycplac33- <i>rpl16b</i> Δ51               | URA3 | Site-directed mutagenesis using QuickChangeII Site-Directed Mutagenesis kit from Agilent with the oligos AG11/AG12 and pAGH2 as template. * product of a PCR with mutagenized pAGH3 as template and primers AG9/O1235 was subcloned into Ycplac33 to avoid other mutations in the vector backbone |
| pAGH4     | Ycplac33- <i>rpl16b</i> Δ28               | URA3 | Site-directed mutagenesis using QuickChangeII Site-Directed Mutagenesis kit from Agilent with the oligos AG13/AG14 and pAGH2 as template. * product of a PCR with mutagenized pAGH4 as template and primers AG9/O1235 was subcloned into Ycplac33 to avoid other mutations in the vector backbone |
| Yeplac195 | Yeplac195                                 | URA3 | Gietz and Sugino, Gene 74 (2), p. 527-534                                                                                                                                                                                                                                                         |
| TK487     | Yeplac195-pRPS28-RPS24-FLAG               | URA3 | Ferreira-Cerca et al., 2007 (suppl. data)                                                                                                                                                                                                                                                         |
| pAGH5     | Yeplac195-pRPS28-RPL16B-FLAG              | URA3 | product of a PCR with pAGH2 as template and primers AG15/AG16 was BamHI/PstI cloned into TK487                                                                                                                                                                                                    |
| pAGH6     | Yeplac195-pRPS28- <i>rpl16b</i> Δ51 -FLAG | URA3 | product of a PCR with pAGH3 as template and primers AG15/AG17 was BamHI/PstI cloned into TK487                                                                                                                                                                                                    |
| pAGH7     | Yeplac195-pRPS28- <i>rpl16b</i> Δ28 -FLAG | URA3 | product of a PCR with pAGH4 as template and primers AG15/AG18 was BamHI/PstI cloned into TK487                                                                                                                                                                                                    |
| pAGH8     | Ycplac33-pRPS28-RPL16B-FLAG               | URA3 | pvull cassette from pAGH5 was cloned into Ycplac33                                                                                                                                                                                                                                                |
| pAGH9     | Ycplac33-pRPS28- <i>rpl16b</i> Δ51 -FLAG  | URA3 | pvull cassette from pAGH6 was cloned into Ycplac33                                                                                                                                                                                                                                                |
| pAGH10    | Ycplac33-pRPS28- <i>rpl16b</i> Δ28 -FLAG  | URA3 | pvull cassette from pAGH7 was cloned into Ycplac33                                                                                                                                                                                                                                                |
